# Supplementary material for: Interferon alpha inhibits antigen-specific production of proinflammatory cytokines and enhances antigen-specific transforming growth factor beta production in antigen-induced arthritis
Source: PubMed Central journal article supplement (PMC3978460; doi:10.1186/ar4326), 2013-10-03

Figure S1

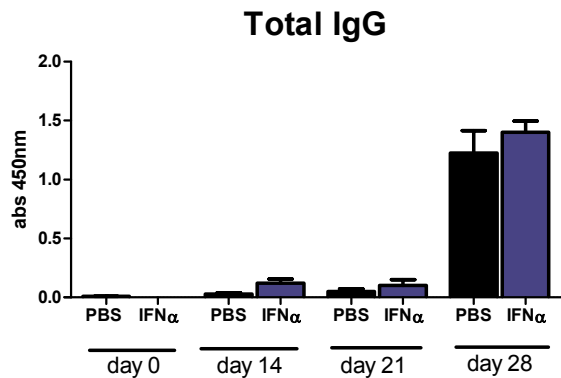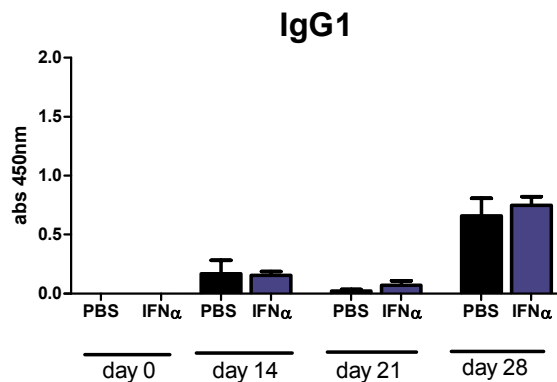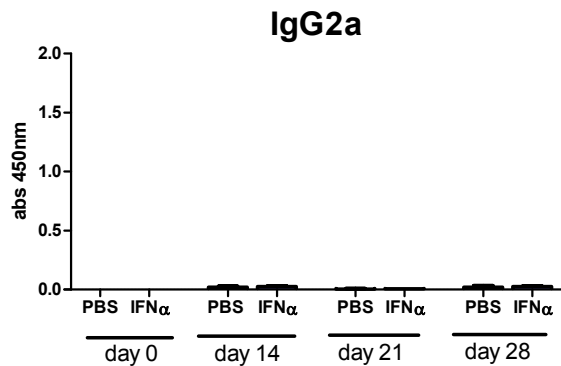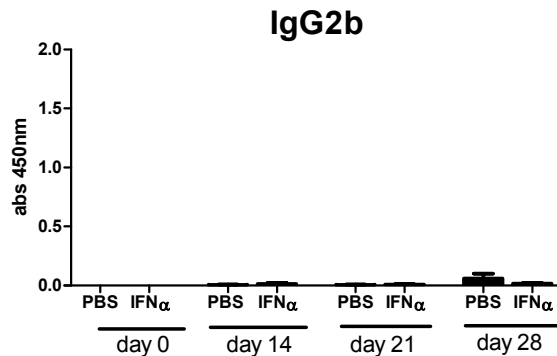

Supplement: ar4326-S1.pdf [file ar4326-S1.pdf]
