# Supplementary material for: Interferon alpha inhibits antigen-specific production of proinflammatory cytokines and enhances antigen-specific transforming growth factor beta production in antigen-induced arthritis
Source: PubMed Central journal article supplement (PMC3978460; doi:10.1186/ar4326), 2013-10-03

Figure S2

● PBS treated group (control)

■ IFN $\alpha$  treated group

**A**

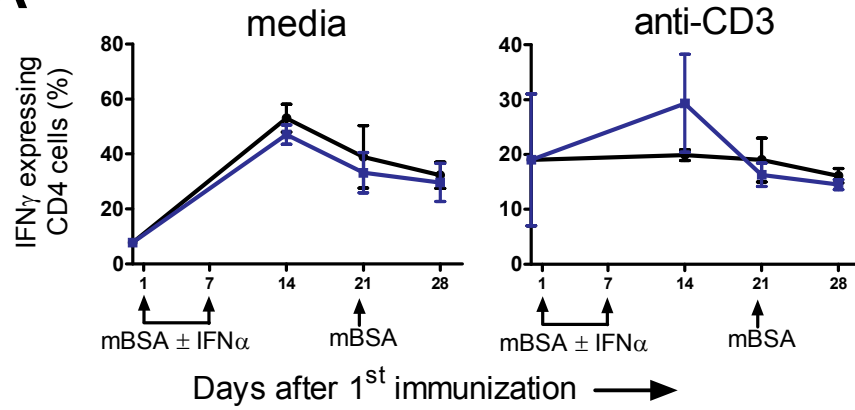

**D**

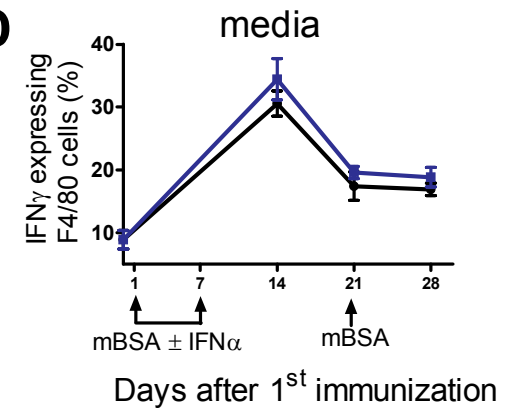

**B**

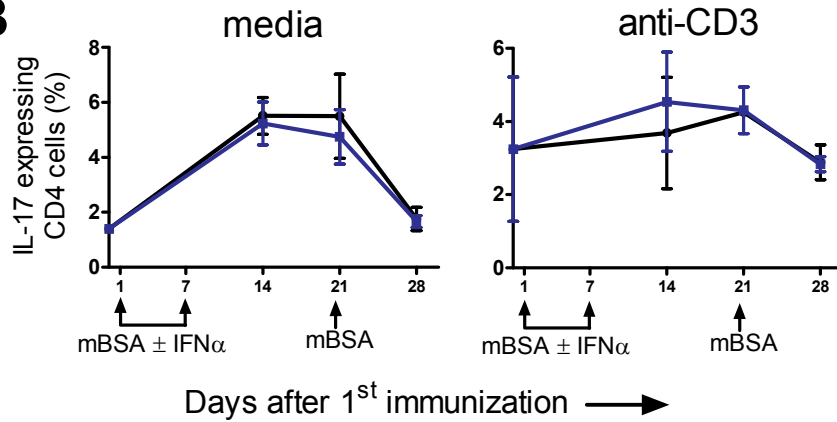

**E**

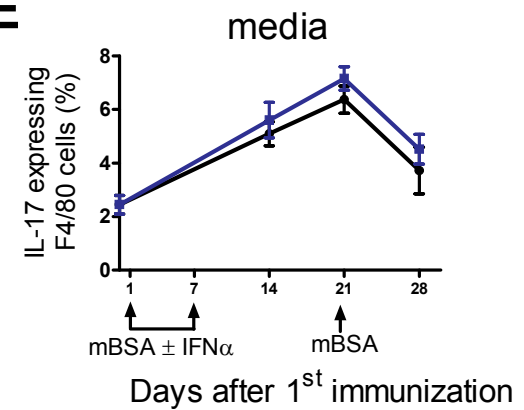

**C**

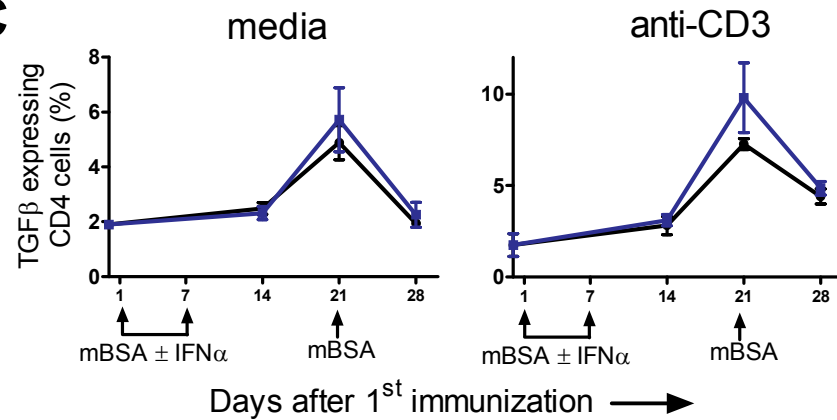

**F**

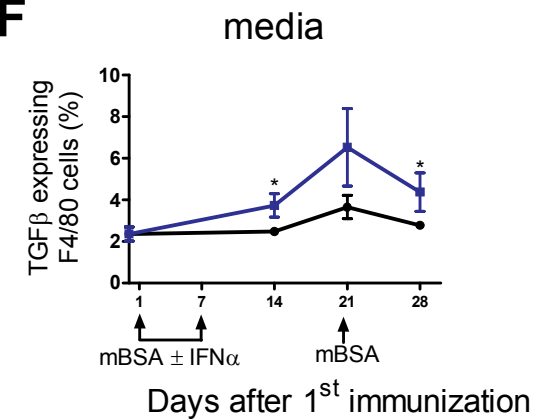

Supplement: ar4326-S3.pdf [file ar4326-S3.pdf]
