# Supplementary figures and images for: Interferon alpha inhibits antigen-specific production of proinflammatory cytokines and enhances antigen-specific transforming growth factor beta production in antigen-induced arthritis
Source: Springer Nature journal article supplement (doi:10.1186/ar4326), 2013-10-03

supplementary fig 1

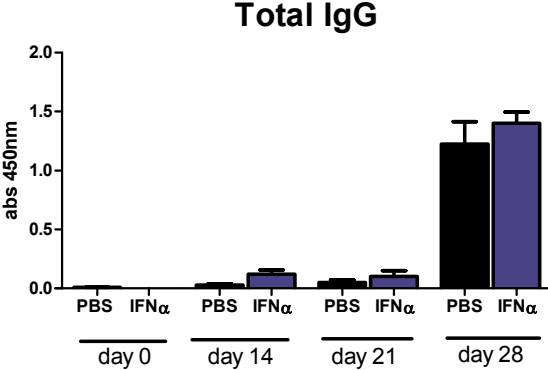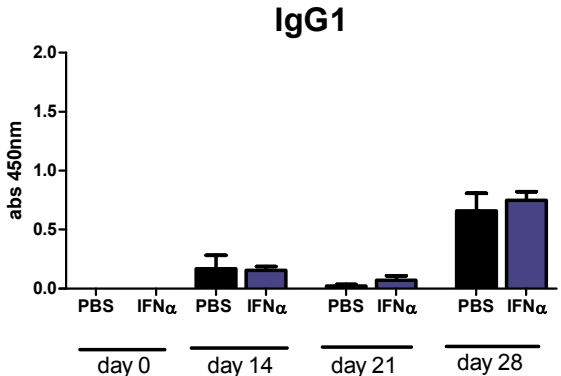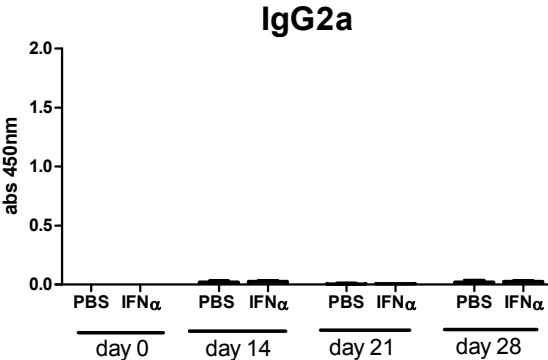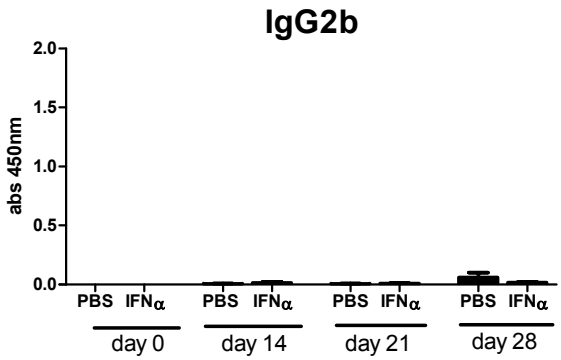

Supplement: 13075_2013_4410_MOESM11_ESM.pdf [file 13075_2013_4410_MOESM11_ESM.pdf]
